# Supplementary material
Source: Springer Nature journal article supplement (https://www.springermedizin.de/resource/supplementary/12882_2014_883_MOESM1_ESM.pdf/9454518)

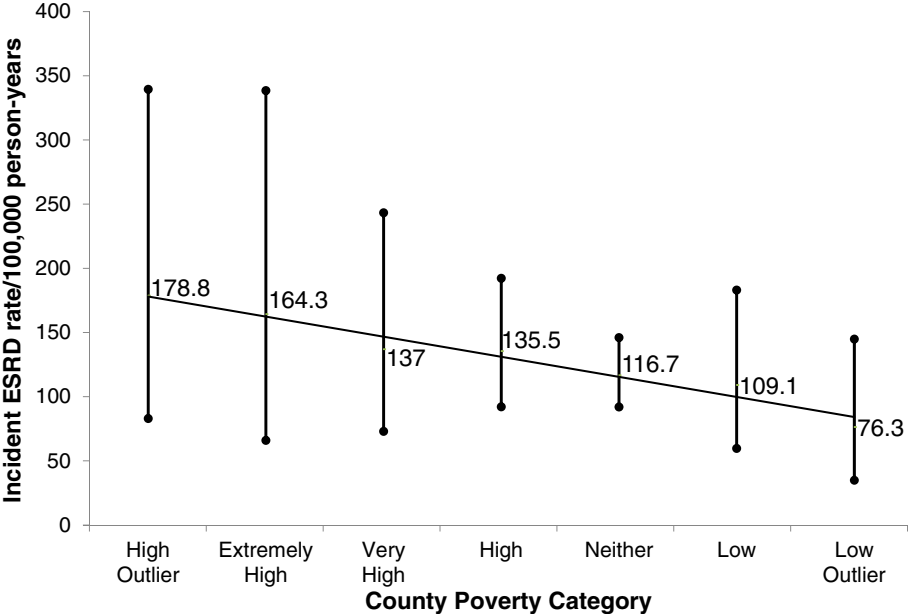

Supplement: MOESM1 [file 9454518]
